# Supplementary material for: Indolo[3,2-b]indole-based crystalline hole-transporting material for highly efficient perovskite solar cells
Source: PubMed Central journal article supplement (PMC5299807; doi:10.1039/c6sc02832b), 2016-09-05
Supplement: SC-008-C6SC02832B-s001.pdf [file SC-008-C6SC02832B-s001.pdf]

## Electronic Supplementary Information (ESI)

### Indolo[3,2-b]indole-based Crystalline Hole Transporting Material for Highly Efficient Perovskite Solar Cells

Illhun Cho,<sup>a†</sup> Nam Joong Jeon,<sup>b†</sup> Oh kyu Kwon,<sup>a</sup> Dong Won Kim,<sup>a</sup> Eui Hyuk Jung,<sup>b</sup> Jun Hong Noh,<sup>b</sup> Jangwon Seo,<sup>\*b</sup> Sang Il Seok<sup>\*bc</sup> and Soo Young Park<sup>\*a</sup>

## Experimental

### 1. Characterization

Chemical structures were fully identified by  $^1\text{H}$  NMR (Bruker, Avance-300),  $^{13}\text{C}$  NMR (Bruker, Avance-500), GC-MASS (JEOL, JMS-700), and elemental analysis (Flash 2000, Thermo Scientific). UV-vis spectra were recorded on a SMIMADZU UV-1650PC. Solution absorption spectra were obtained with the concentration of  $1.0 \times 10^{-5}$  M in THF, and film absorption spectra were obtained with spin-coated sample on quartz substrate (using 1 wt% in  $\text{CHCl}_3$ , 1500rpm/60s). The out-of-plane XRD analysis was carried out using a Bruker D8-Advance X-ray diffractometer. Single crystal X-ray crystallographic data was collected by Bruker SMART APEX II X-ray diffractometer and was analyzed by Bruker SHELXTL software. HOMO energy level of the compound was obtained from the cyclic voltammetry measurement. Cyclic voltammetry measurement was performed using a 273A (Princeton Applied Research) with an one-compartment electrolysis cell consisting of a ITO patterned glass working-electrode, a platinum wire counter-electrode, and a quasi  $\text{Ag}^+/\text{Ag}$  electrode as reference. Measurement was performed in an acetonitrile solution with 0.1 M tetrabutylammonium tetrafluoroborate as the supporting electrolyte, at a scan rate of 50 mV/s. Oxidation potential was calibrated using ferrocene as a reference. HOMO energy level of p,p-Spiro-OMeTAD and IDIDF were evaluated from the equation of  $\text{HOMO} = -(4.8 + (V_{\text{ox}} - V_{\text{ferro}}))$ , in which  $V_{\text{ox}}$  is onset position of sample oxidation scan,  $V_{\text{ferro}}$  is onset position of ferrocene oxidation scan, and the LUMO energy level was evaluated from the HOMO energy level and the solid-state optical energy bandgap, which was obtained from the edge of absorption spectra. Hole mobilities were measured using the space-charge-limited-current (SCLC) model with hole-only device utilizing the configuration of indium tin oxide (ITO)/ Poly(3,4-ethylenedioxythiophene)-polystyrene sulfonate (PEDOT:PSS, ~30 nm)/p,p-Spiro-OMeTAD (~90 nm) or IDIDF (~90nm) (with Li-bis(trifluoromethanesulfonyl) imide (Li-TFSI) and 4-

*tert*-butylpyridine (*t*BP) as additives) /Au (~80 nm). The thicknesses of the coated films were measured using a surface profiler ( Surfcoorder ET 200, Kosaka Laboratory, Ltd.). The solution concentration of hole transport materials was identical to those used to fabricate the optimized perovskite solar cell devices (HTM solution (30mg/ml) with an additive of 21.5  $\mu$ l Li-bis(trifluoromethanesulfonyl) imide (Li-TFSI)/acetonitrile (170 mg/1 ml) and 21.5  $\mu$ l 4-*tert* -butylpyridine (*t*BP)/acetonitrile (1ml/1ml)). The current-voltage curve for the SCLC measurement was obtained using Keithley 4200.

According the Mott-Gurney law, hole mobilities are extrated by using the dark current under forward bias. In order to calculate hole mobility, we have utilized data from current-voltage curve region which accurately corresponds to the  $J$ - $V^2$  condition.

$$J = \frac{9}{8} \epsilon_0 \epsilon_r \mu \frac{V^2}{L^3} \quad (1)$$

In this equation  $\epsilon_0$  is the permittivity of free space,  $\epsilon_r$  is the dielectric constant of the organic semiconductor material (herein  $\epsilon_r$  was assumed to be 3 that typical value for organic semiconducting material),  $\mu$  is the zero-field hole mobility,  $V$  is effective voltage with the equation of  $V = V_{\text{appl}} - V_{\text{bi}} - V_r$  ( $V_{\text{appl}}$ : applied bias,  $V_{\text{bi}}$ : the built in potential due to the difference in electrical contact work function,  $V_r$ : the voltage drop due to contact resistance and series resistance across the electrodes) and  $L$  is the thickness of hole transport layer. The evaluated hole mobilities of p,p-Spiro-OMeTAD and IDIDF with Li-bis(trifluoromethanesulfonyl) imide (Li-TFSI) and 4-*tert*-butylpyridine (*t*BP) as additives are  $2.17 \times 10^{-4}$  and  $1.69 \times 10^{-3}$   $\text{cm}^2\text{v}^{-1}\text{s}^{-1}$  respectively.

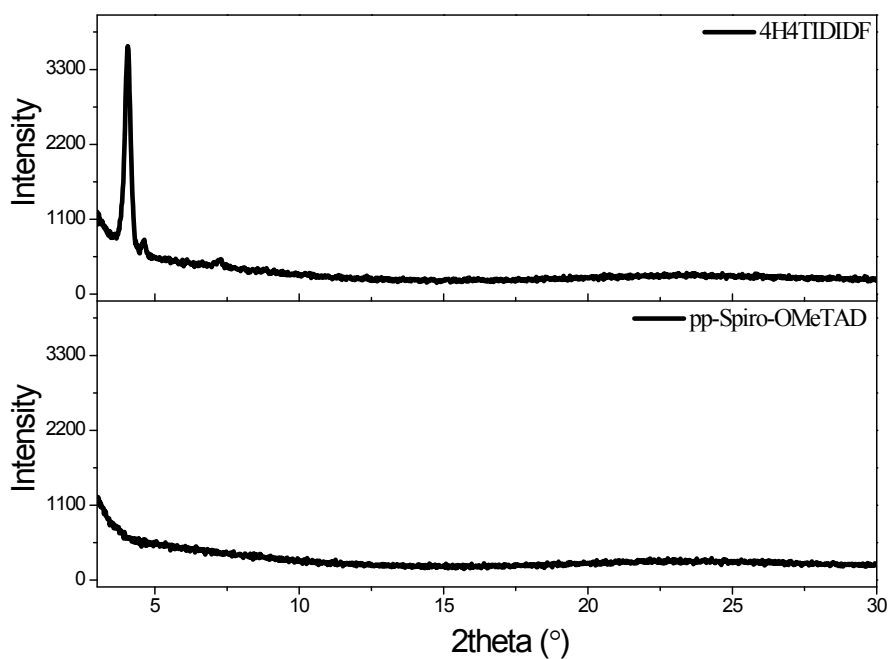

Fig. S1 Out-of-plane XRD of IDIDF and p,p-Spiro-OMeTAD.

Although, recently, crystal structure of the p,p-Spiro-OMeTAD and their melting point in powder state have been reported,<sup>(s1-s3)</sup> the p,p-Spiro-OMeTAD film in this work, which was deposited on the perovskite layer by spin-coating process, exhibited amorphous nature.

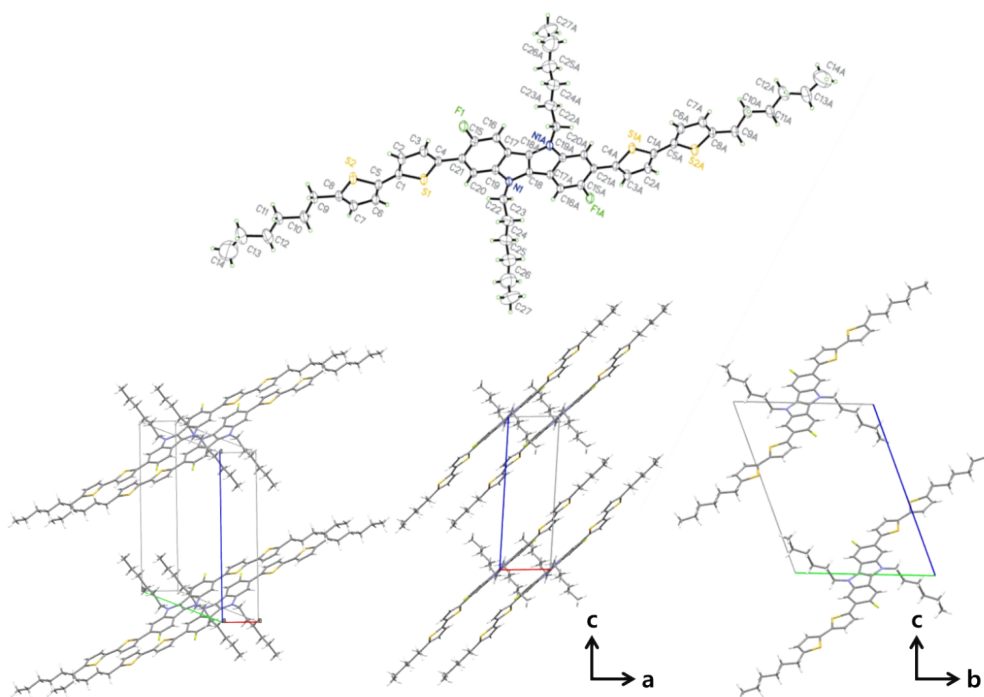

Fig. S2 Single crystal structure of IDIDF.

---

|                                   |                                                                                                                                |
|-----------------------------------|--------------------------------------------------------------------------------------------------------------------------------|
| Identification code               | 20150709_0m                                                                                                                    |
| Empirical formula                 | C <sub>27</sub> H <sub>32</sub> F N S <sub>2</sub>                                                                             |
| Formula weight                    | 453.66                                                                                                                         |
| Temperature                       | 296(1) K                                                                                                                       |
| Wavelength                        | 0.71073 Å                                                                                                                      |
| Crystal system                    | Triclinic                                                                                                                      |
| Space group                       | P-1                                                                                                                            |
| Unit cell dimensions              | a = 5.53520(10) Å      α = 68.1910(10)°.<br>b = 13.7138(2) Å      β = 82.8360(10)°.<br>c = 17.7912(3) Å      γ = 80.8890(10)°. |
| Volume                            | 1234.83(4) Å <sup>3</sup>                                                                                                      |
| Z                                 | 2                                                                                                                              |
| Density (calculated)              | 1.220 Mg/m <sup>3</sup>                                                                                                        |
| Absorption coefficient            | 0.237 mm <sup>-1</sup>                                                                                                         |
| F(000)                            | 484                                                                                                                            |
| Crystal size                      | 0.38 x 0.12 x 0.05 mm <sup>3</sup>                                                                                             |
| Theta range for data collection   | 1.24 to 28.35°                                                                                                                 |
| Index ranges                      | -7 ≤ h ≤ 7, -16 ≤ k ≤ 18, 0 ≤ l ≤ 23                                                                                           |
| Reflections collected             | 6148                                                                                                                           |
| Independent reflections           | 6148 [R(int) = 0.0000]                                                                                                         |
| Completeness to theta = 28.35°    | 99.4 %                                                                                                                         |
| Absorption correction             | Multi-scan                                                                                                                     |
| Max. and min. transmission        | 0.9882 and 0.9152                                                                                                              |
| Refinement method                 | Full-matrix least-squares on F <sup>2</sup>                                                                                    |
| Data / restraints / parameters    | 6148 / 6 / 280                                                                                                                 |
| Goodness-of-fit on F <sup>2</sup> | 1.084                                                                                                                          |
| Final R indices [I > 2σ(I)]       | R1 = 0.0756, wR2 = 0.2440                                                                                                      |
| R indices (all data)              | R1 = 0.1261, wR2 = 0.2884                                                                                                      |
| Largest diff. peak and hole       | 0.619 and -0.462 e.Å <sup>-3</sup>                                                                                             |

---

Table S1. Crystal data and structure refinement for IDIDF.

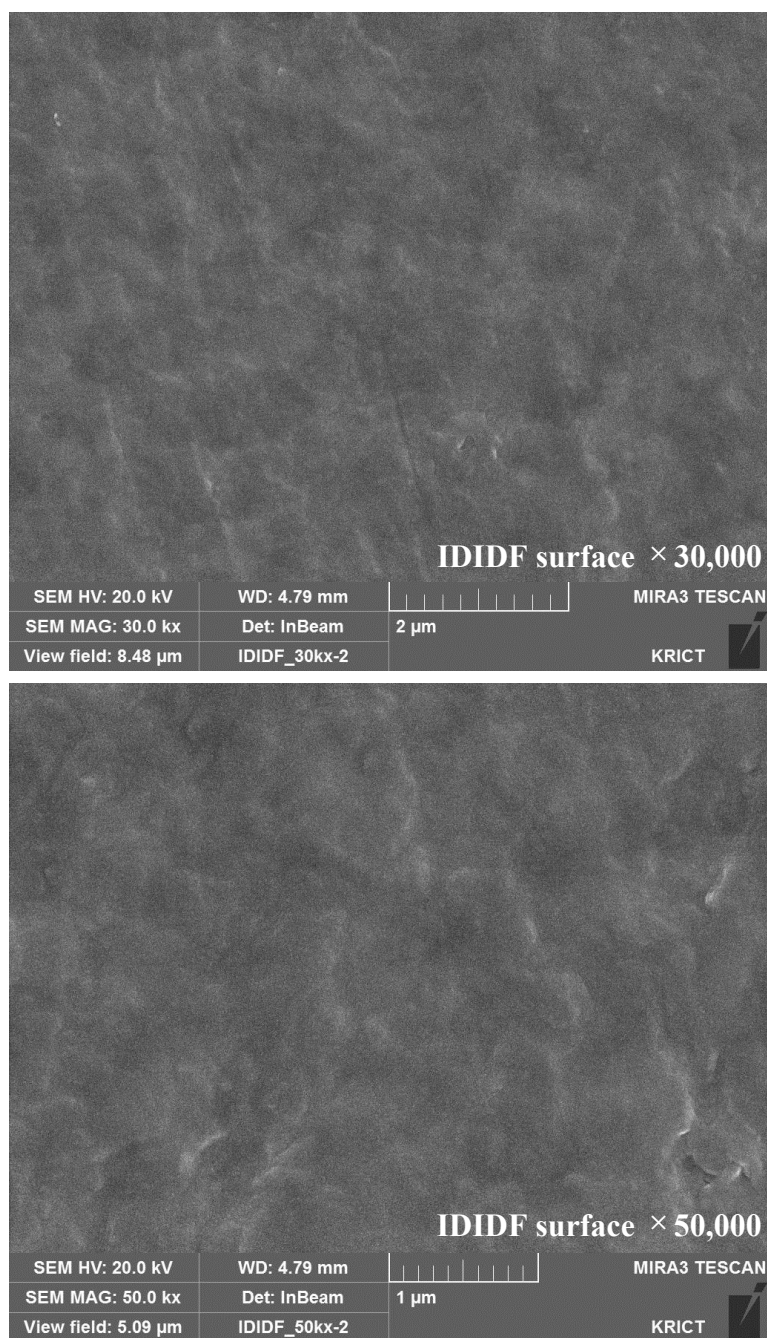

Fig. S3 . Higher-magnification SEM images of the top view of the IDIDF layer

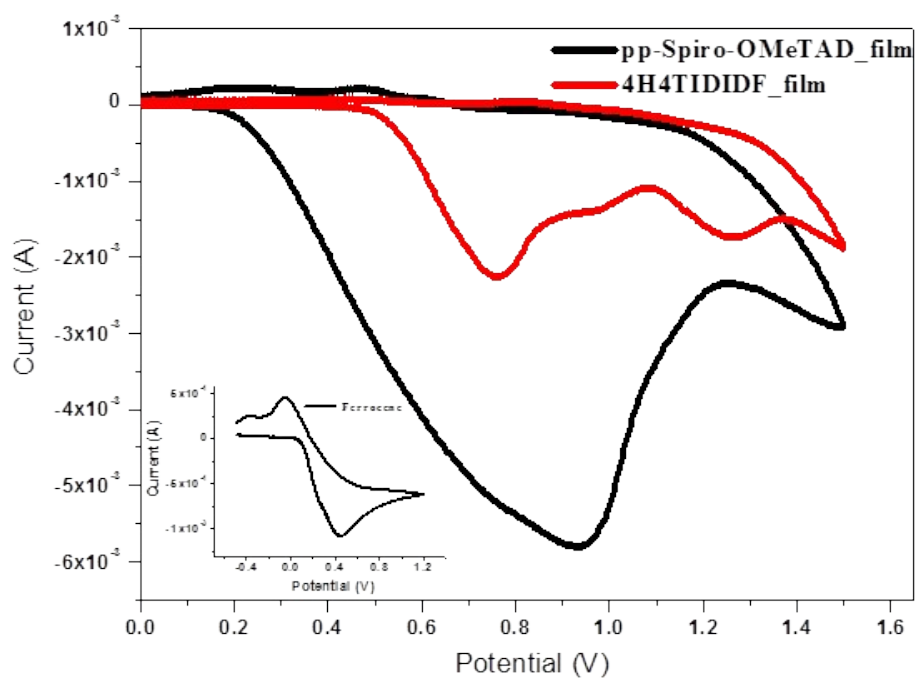

Fig. S4 Cyclic voltammograms (CVs) of IDIDF and p,p-Spiro-OMeTAD. Film samples were prepared on ITO patterned glass by drop-casting method (Inset: CV of ferrocene).



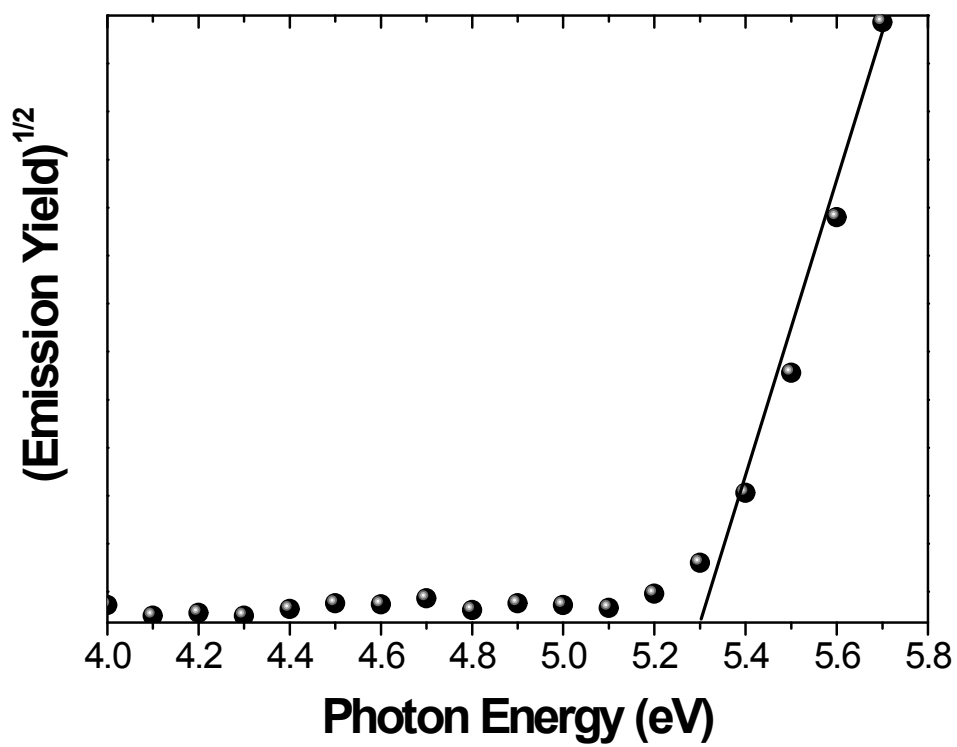

Fig. S5 Photoelectron spectrum of the mixed perovskite film on a fused silica substrate.

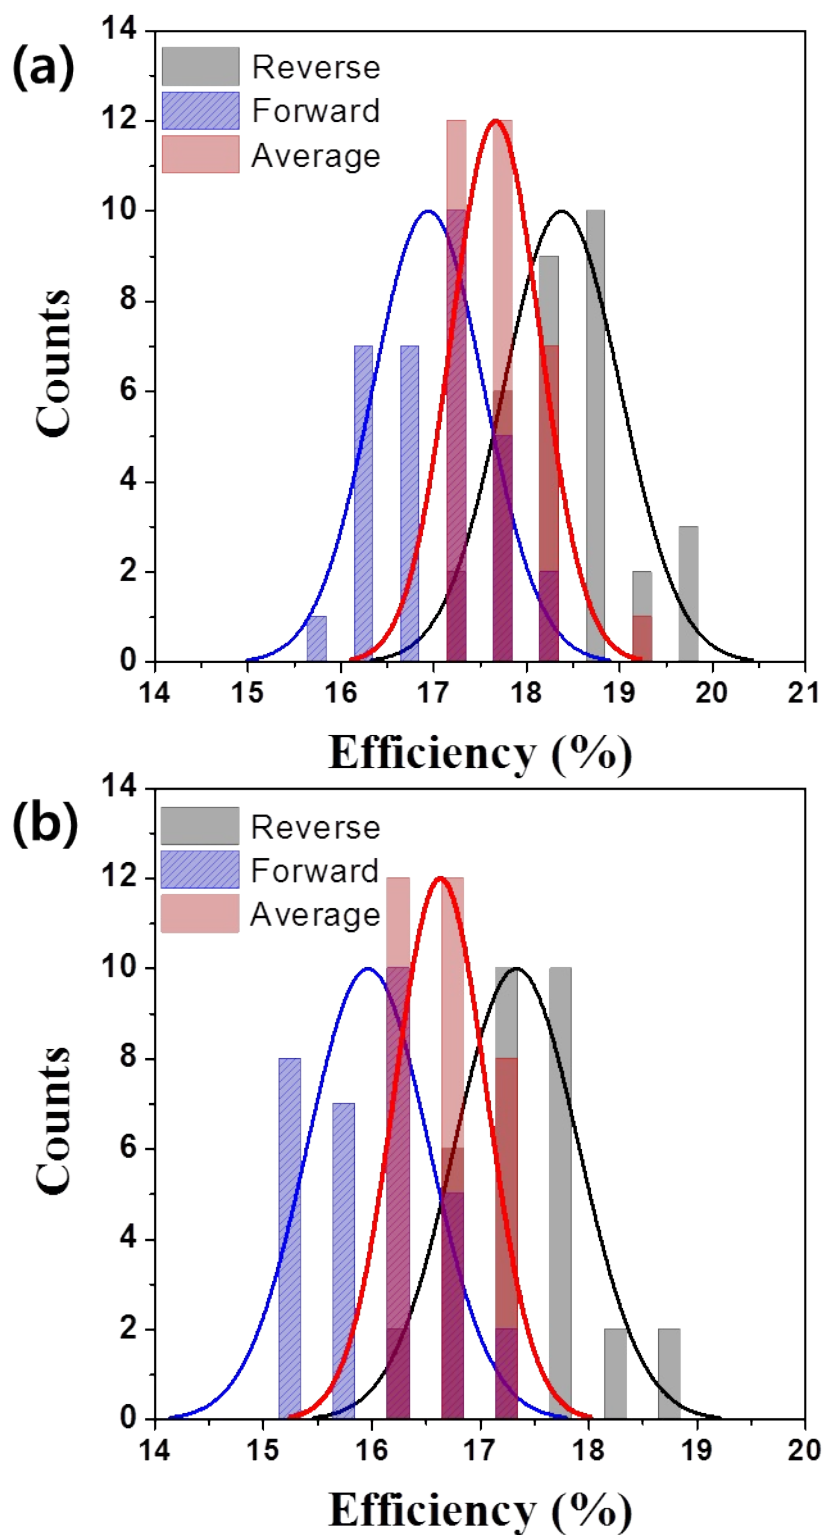

Fig. S6 Statistical power conversion efficiency distribution of 32 PSC devices for IDIDF (a) and p,p-Spiro-OMeTAD (b)

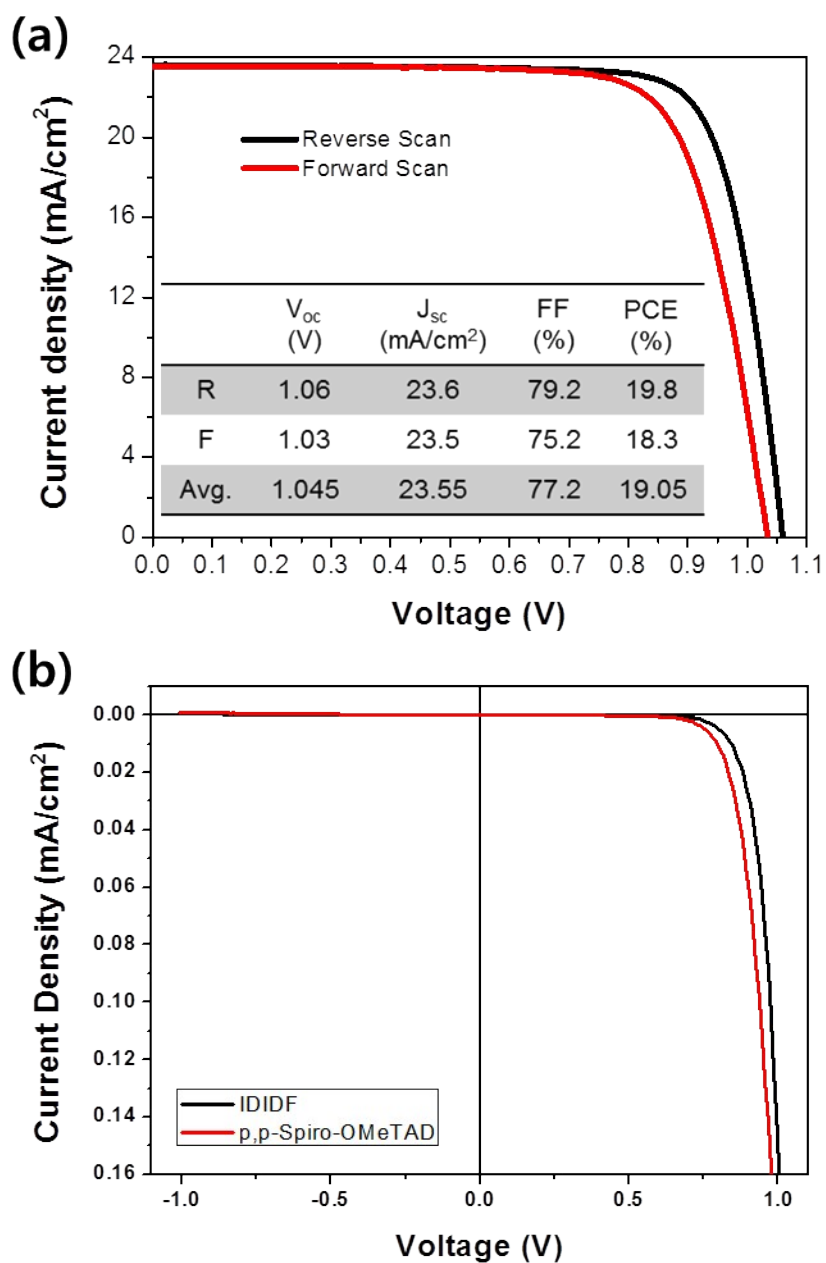

Fig. S7 (a)  $J$ - $V$  curve for the best device with IDIDF under reverse (black) and forward (red) scans. The inset shows the average values of the photovoltaic parameters obtained from  $J$ - $V$  curves under both scans. (b)  $J$ - $V$  curve for dark current of the device with IDIDF (black) and p,p-Spiro-OMeTAD (red)

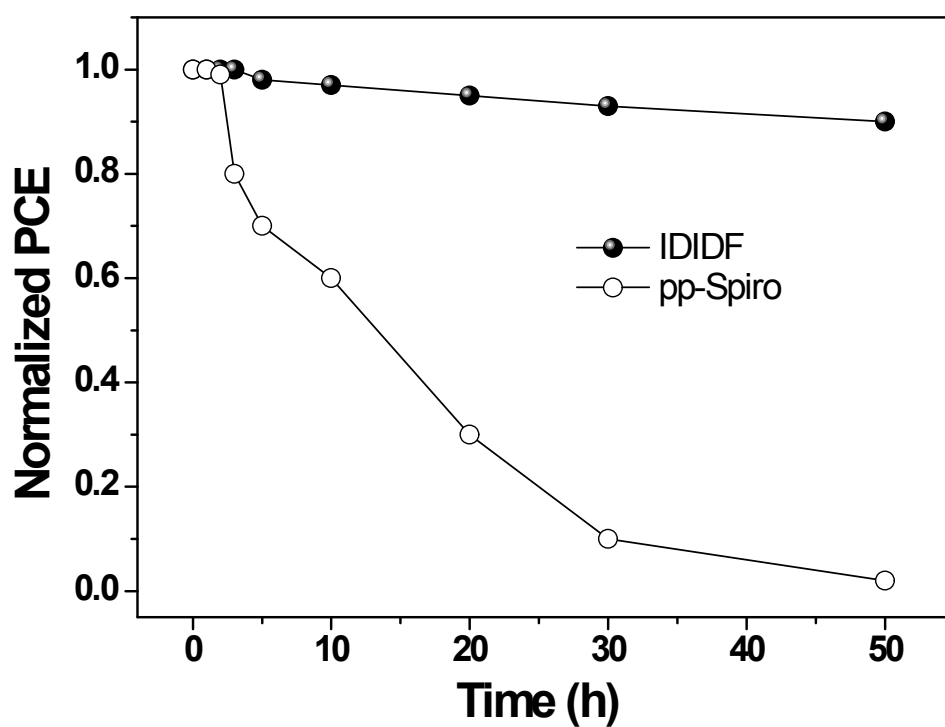

Fig. S8 Efficiency decay curves of the perovskite solar cell employing IDIDF and p,p-Spiro-OMeTAD (without encapsulation under a high humidity of 85%)

Mass Spectrum ]  
Date : 23-Jun-2015 16:45  
Sample: 4H4TIDIDF  
Ion Mode : FAB+  
Spectrum Type : Normal Ion [MF-Linear]  
Scan# : (10,12)  
m/z 154.0000 Int. : 415.75  
Output m/z range : 11.4675 to 1000.5625 Cut Level : 0.00 %

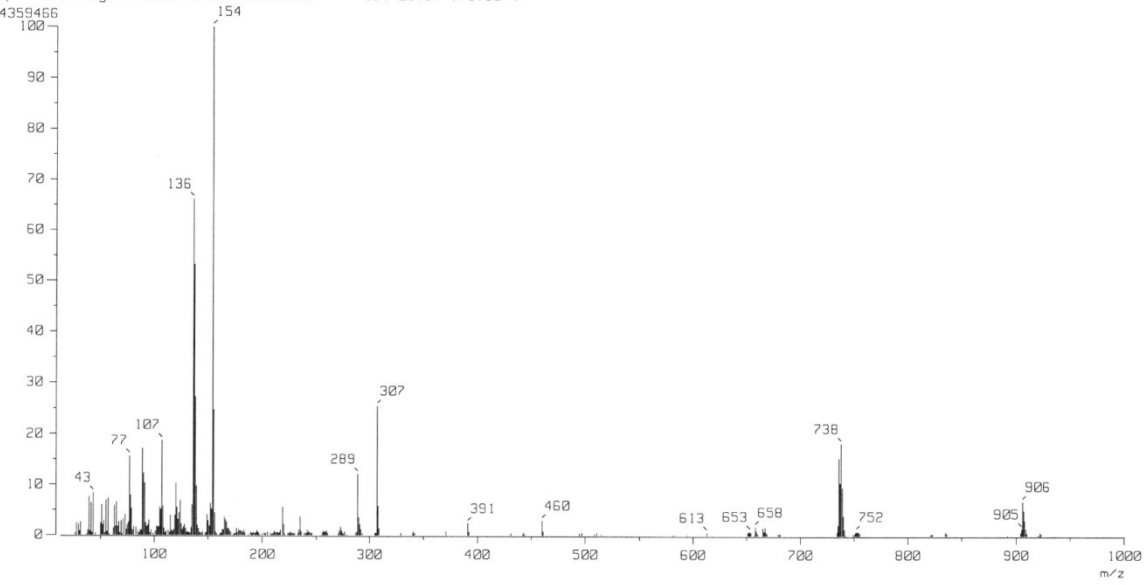

**Fig. S9 high-resolution mass data of 4H4TIDIDF**

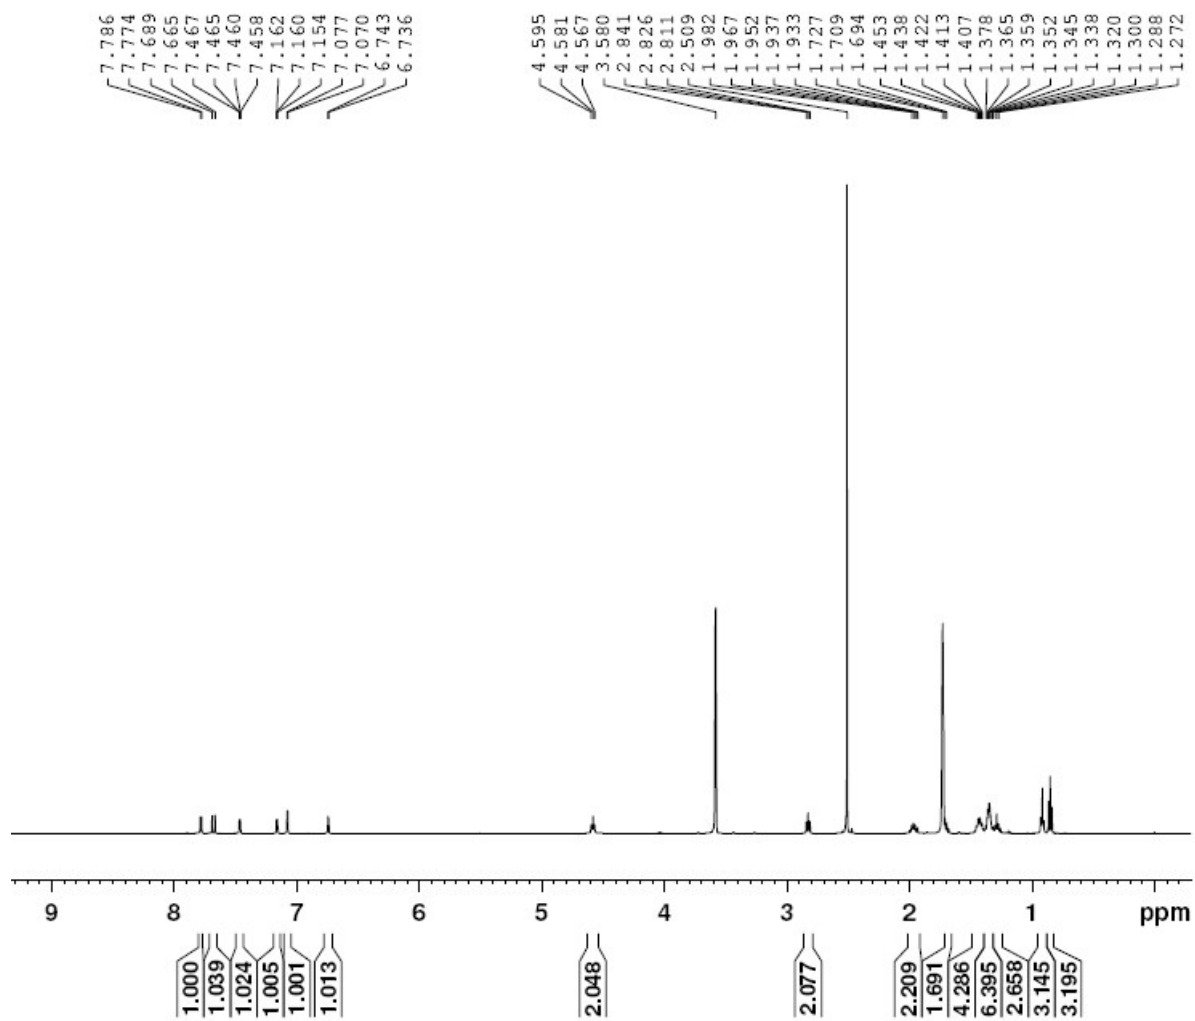

Fig. S10  $^1\text{H}$  NMR data of 4H4TIDIDF

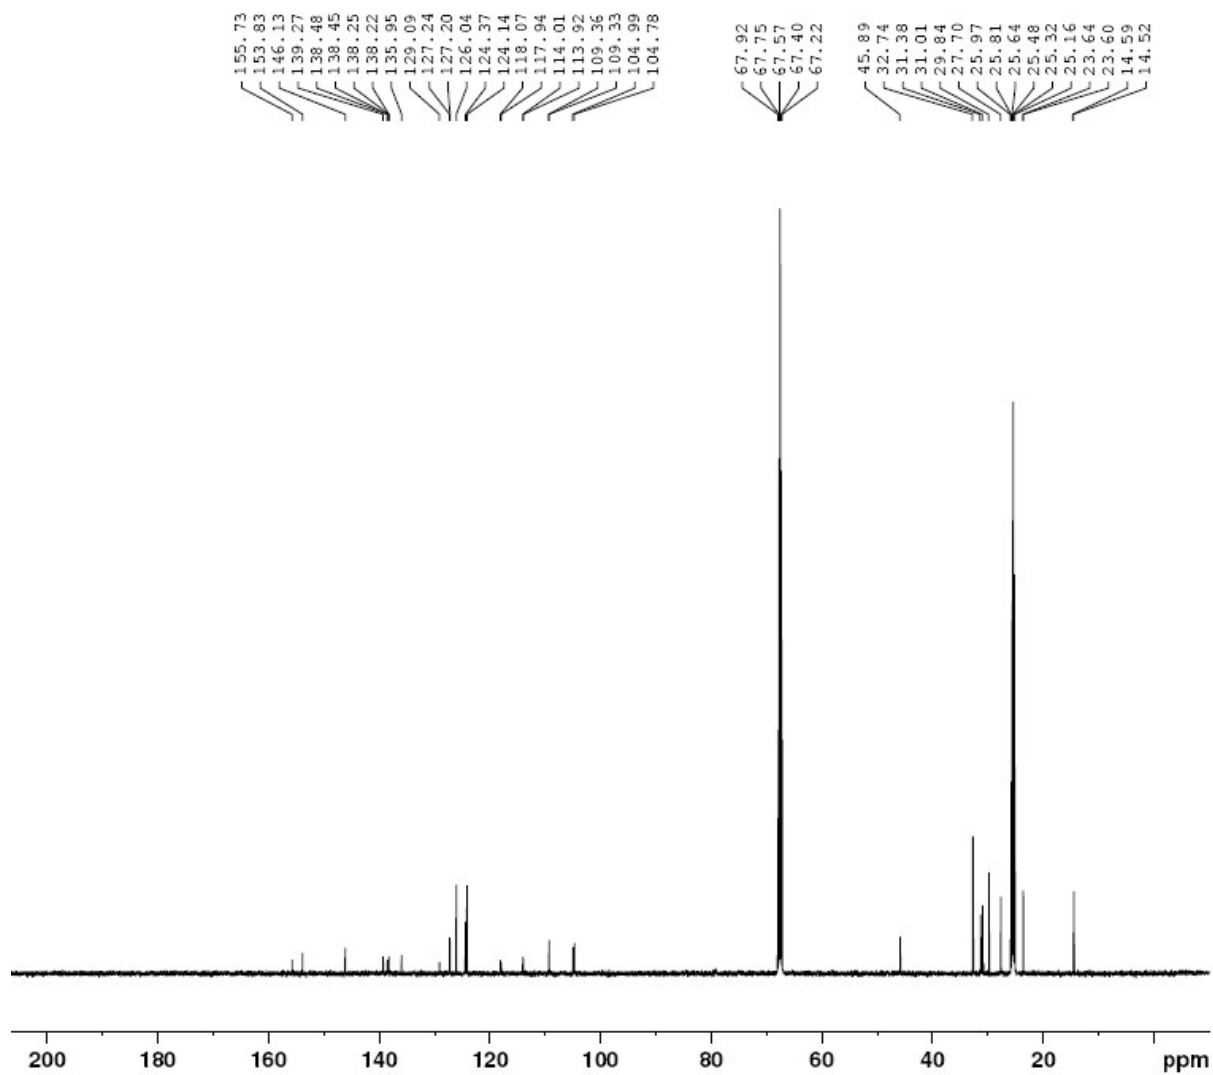

**Fig. S11**  $^{13}\text{C}$  NMR data of 4H4TIDIDF

## References

- s1. T. Leijten, I-K. Ding, T. Giovenzana, J. T. Bloking, M. D. McGehee, A. Sellinger, *ACS Nano*, 2012, 6, 1455.
- s2. K. Rakstys, M. Saliba, P. Gao, P. Gratia, E. Kamarauskas, S. Paek, V. Jankauskas, M. K. Nazeeruddin, *Angew. Chem. Int. Ed.* 2016, 55, 7464.
- s3. P. Ganesan, K. Fu, P. Gao, I. Raabe, K. Schenk, R. Scopelliti, J. Luo, L. H. Wong, M. Grätzel, M. K. Nazeeruddin, *Energy Environ. Sci.* 2015, 8, 1986.
